# Supplementary material for: Label-free monitoring of therapy response in 3D spheroids using lab-on-a-chip impedance spectroscopy
Source: Royal Society of Chemistry journal article supplement (doi:10.1039/d5lc00815h), 2026-01-01
Supplement: d5lc00815h1.pdf [file d5lc00815h1.pdf]

|              | 10kHz | 20kHz | 40kHz | 60kHz | 80kHz | 100kHz |
|--------------|-------|-------|-------|-------|-------|--------|
| Experiment 1 |       | *     | *     | *     | *     | *      |
| Experiment 2 |       |       |       | *     | **    | **     |
| Experiment 3 |       | **    | ***   | ****  | ****  | ****   |

**Supplementary table 1.** Distinction of spheroid size by low-frequency impedance measurement replicate experiments. Table depicts at which evaluated discrete frequencies significant differences were found between the spheroids seeded with 2000 and 4000 cells.

|              | 60kHz | 80kHz | 100kHz | 200kHz | 300kHz | 400kHz | 500kHz | 600kHz | 700kHz | 800kHz | 900kHz | 1MHz | 2MHz | 3MHz | 4MHz | 6MHz | 8MHz |
|--------------|-------|-------|--------|--------|--------|--------|--------|--------|--------|--------|--------|------|------|------|------|------|------|
| Experiment 1 |       |       |        |        |        | *      | **     | **     | **     | **     | **     |      | *    | **   | *    |      |      |
| Experiment 2 |       |       |        |        | *      | *      | **     | **     | **     | **     | **     | *    | **   | **   |      |      |      |
| Experiment 3 |       |       |        | *      | **     | **     | **     | **     | *      | *      | **     | **   | *    | *    |      |      |      |

**Supplementary table 2.** Replicate experiments for impedance measurements of 3D spheroids 3 days after radiation treatment. Table depicts at which evaluated discrete frequencies significant differences were found between the control and spheroids irradiated at 4Gy.

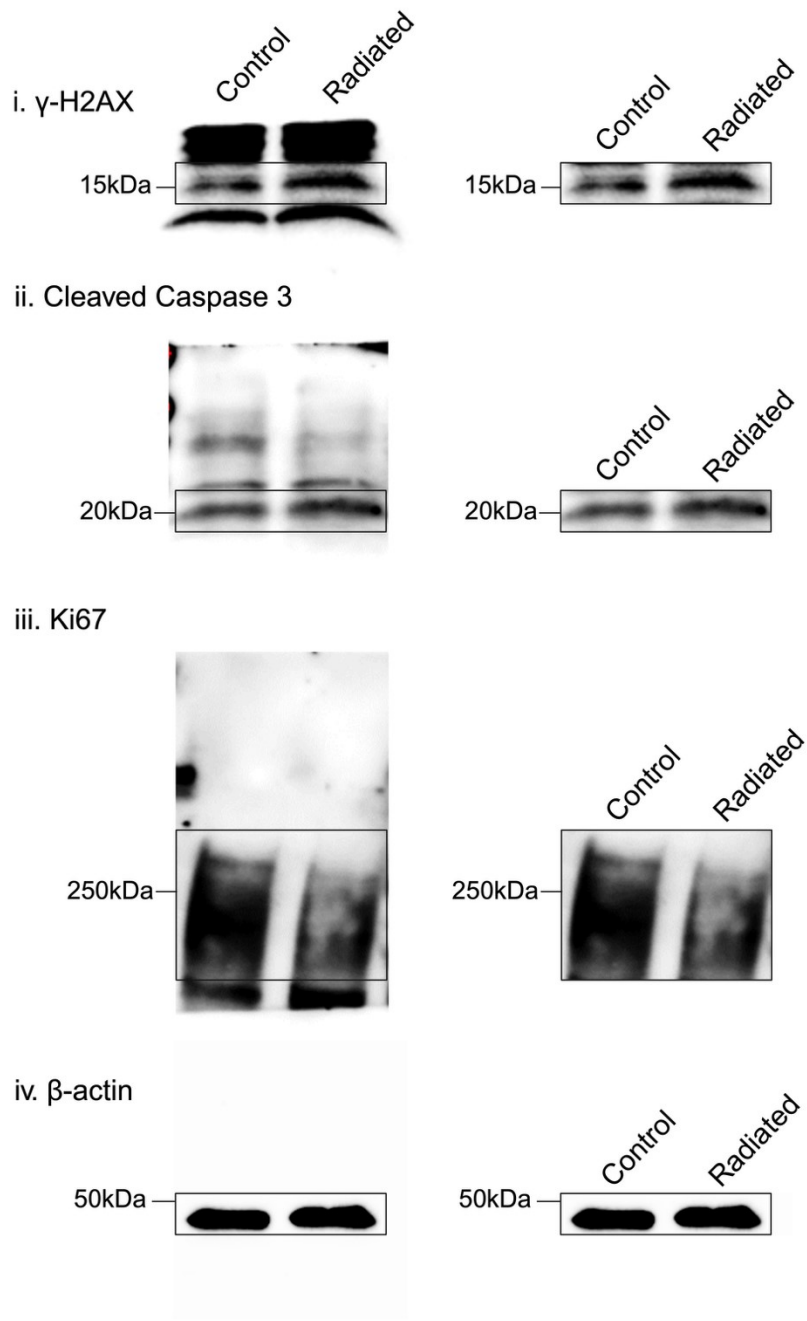

**Supplementary figure 1.** Raw western blot data for the evaluated biomarkers related to radiation response that may influence changing spheroid opacity.
